# Supplementary material for: SUN Family Proteins Sun4p, Uth1p and Sim1p Are Secreted from Saccharomyces cerevisiae and Produced Dependently on Oxygen Level
Source: PubMed Central journal article supplement (PMC3770667; doi:10.1371/journal.pone.0073882), 2013-09-11
Supplement: pone.0073882.s002.pdf [file pone.0073882.s002.pdf]

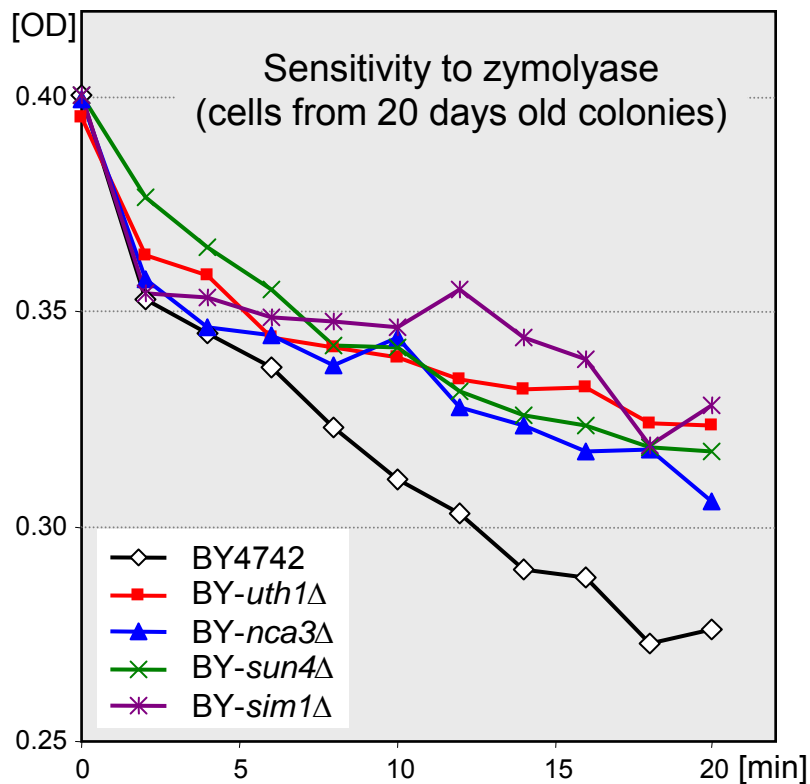

**Figure S2**

Resistance of cells from 20 days old colonies grown on GMA to zymolyase presented as decrease in density of cell suspension. Values represent averages from 4 independent biological replicates for the mutant strains and 6 replicates for the wt; the significance of the difference between BY4742 and the other four strains was determined using two-way ANOVA with  $p < 0.05$ .
