# Supplementary material for: SUN Family Proteins Sun4p, Uth1p and Sim1p Are Secreted from Saccharomyces cerevisiae and Produced Dependently on Oxygen Level
Source: PubMed Central journal article supplement (PMC3770667; doi:10.1371/journal.pone.0073882), 2013-09-11
Supplement: pone.0073882.s003.pdf [file pone.0073882.s003.pdf]

A. Loading controls for Figure 1A

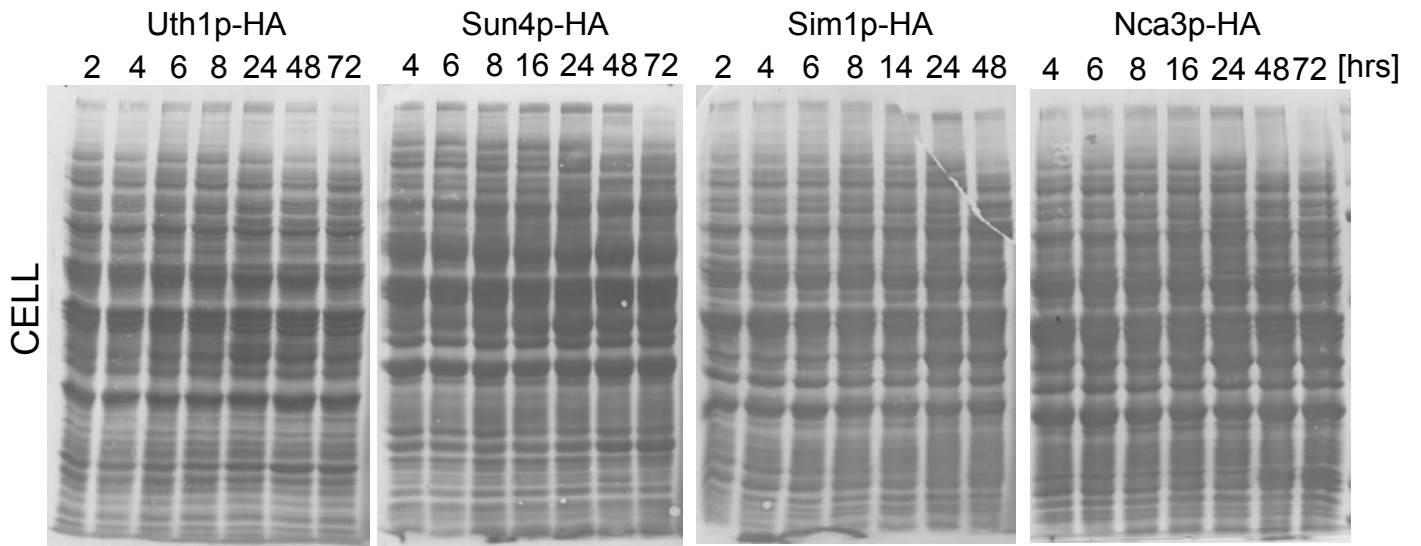

B. Loading controls for Figure 2

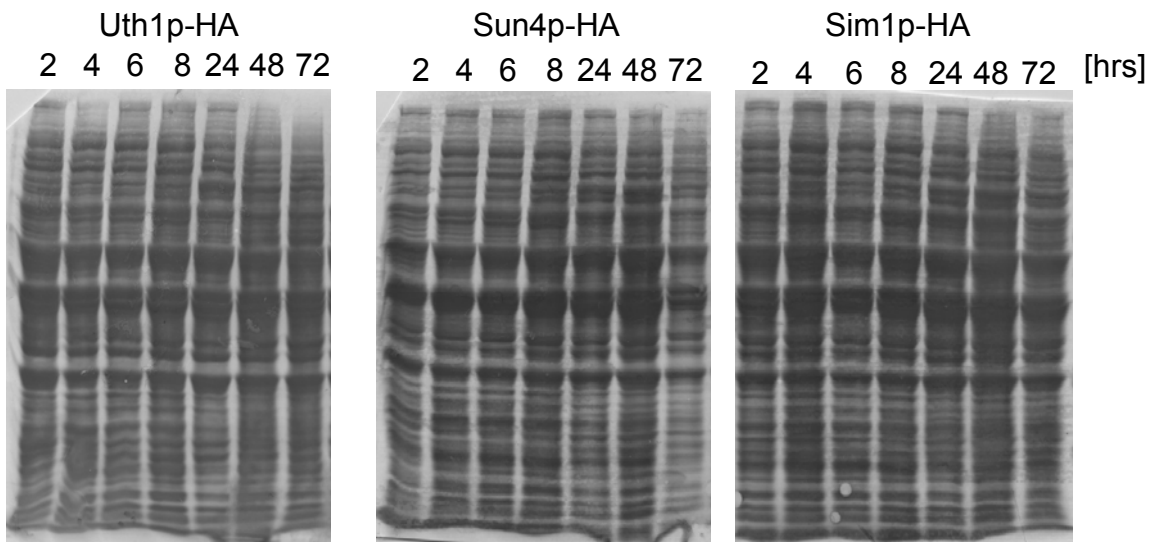

C. Loading controls for Figure 3

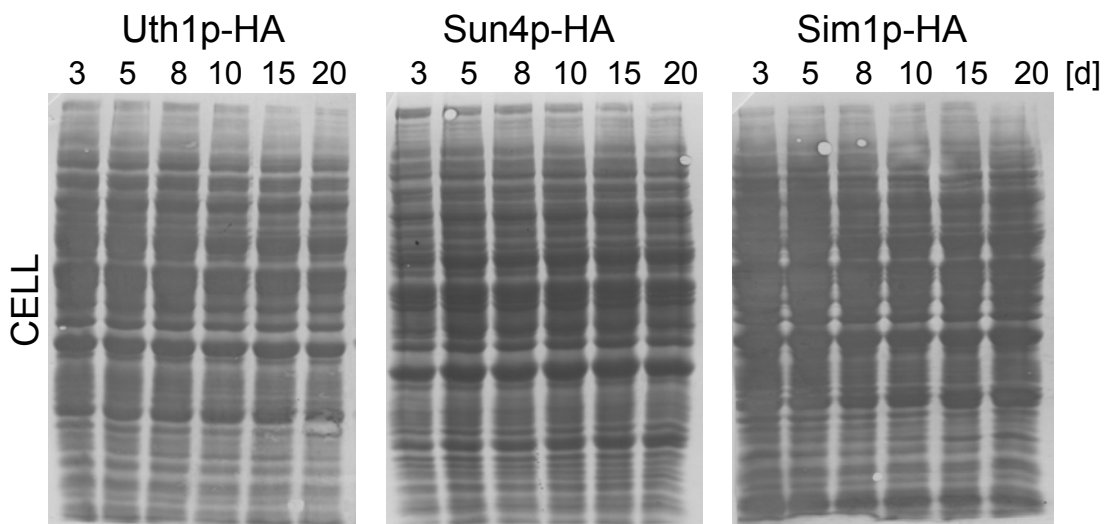

D. Loading controls for Figure 4

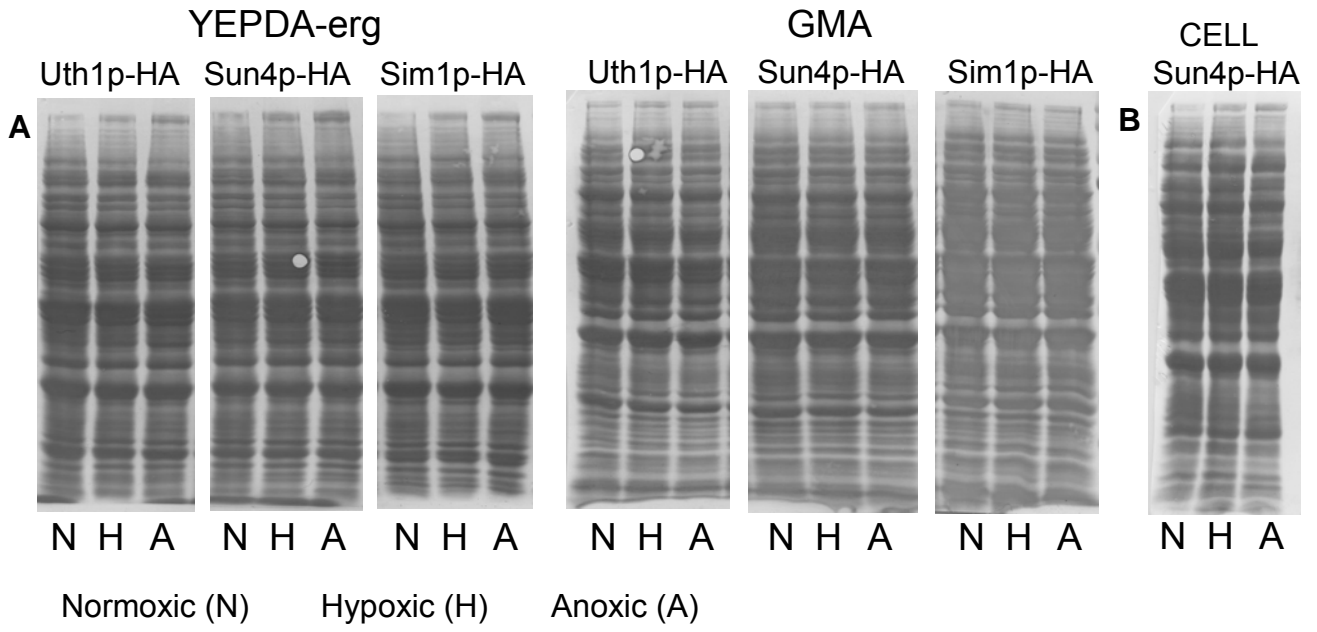

**Figure S3:** Loading controls for Western blots shown in Figures 1, 2, 3 and 4.
