# Supplementary material for: SUN Family Proteins Sun4p, Uth1p and Sim1p Are Secreted from Saccharomyces cerevisiae and Produced Dependently on Oxygen Level
Source: PubMed Central journal article supplement (PMC3770667; doi:10.1371/journal.pone.0073882), 2013-09-11
Supplement: pone.0073882.s004.pdf [file pone.0073882.s004.pdf]

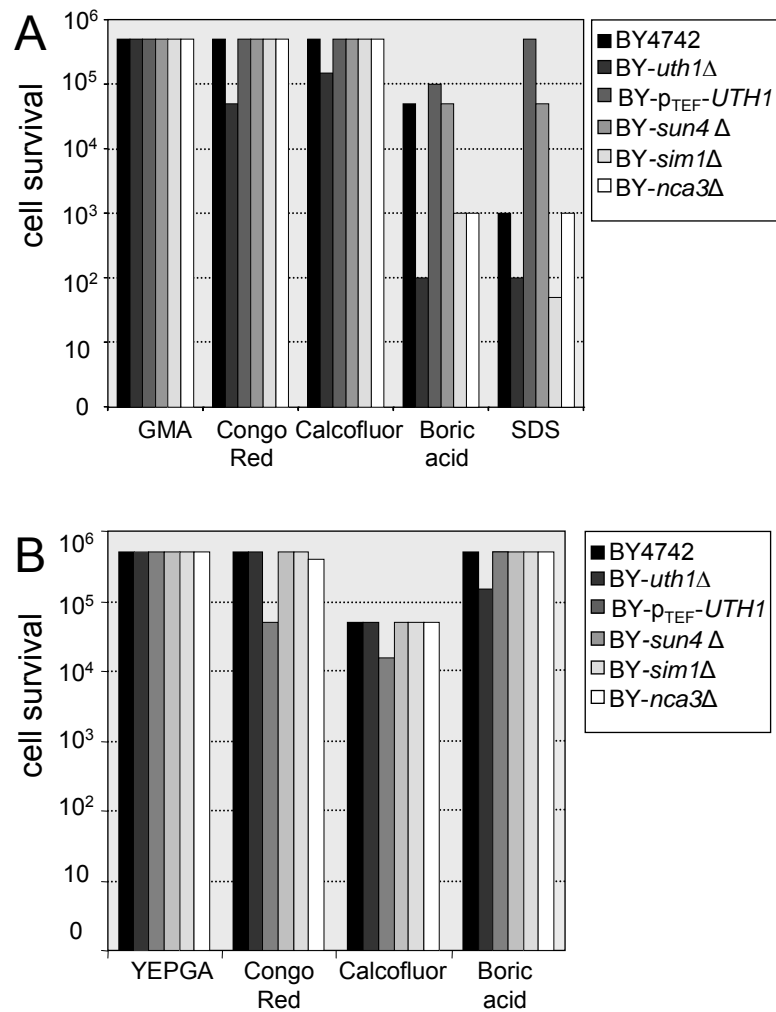

**Figure S4**

Sensitivity of strains deficient in SUN proteins to toxic compounds either on respiratory GMA (A) or on fermentative YEPDA (B) agar. Quantification of drop assays shown at Figures 5 and 6.
