# Supplementary material for: SUN Family Proteins Sun4p, Uth1p and Sim1p Are Secreted from Saccharomyces cerevisiae and Produced Dependently on Oxygen Level
Source: PubMed Central journal article supplement (PMC3770667; doi:10.1371/journal.pone.0073882), 2013-09-11
Supplement: pone.0073882.s005.pdf [file pone.0073882.s005.pdf]

Table S1: List of the primers

| primer                     | sequence (5'→3')                                                                                          | purpose                                                  |
|----------------------------|-----------------------------------------------------------------------------------------------------------|----------------------------------------------------------|
| UTH1-HA-fw                 | GAC GGT TGT ACT GTT TCA GTT ACT TCT GGT TCT GCT<br>AAC TTT GTC TTC TAC CGT ACG CTG CAG GTC GAC            | C-terminal fusion of <i>UTH1</i><br>with HA              |
| UTH1-HA-rev                | AAA AAA GTA CTA GCA AAA GCT TAT TTG CAA TAT TCA<br>AGG AAA AAA GGC CTA ATC GAT GAA TTC GAG CTC G          | C-terminal fusion of <i>UTH1</i><br>with HA              |
| NCA3-HA-fw                 | ATG GTT GCA CAG TTT CTG TTT TAT CTG GAT CTG CTG<br>AAT TTG TTT TCT ATC GTA CGC TGC AGG TCG AC             | C-terminal fusion of <i>NCA3</i><br>with HA              |
| NCA3-HA-rev                | ATT GAG GGT ATC AAA ATA CAA GAC ATT CTT TTA CCG<br>AAA AGA AGA ATG ACA TCG ATG AAT TCG AGC TCG            | C-terminal fusion of <i>NCA3</i><br>with HA              |
| SUN4-HA-fw                 | GTT GTA CCG TTT CCG TTA CTG CTG GCA AAG CTA AGT<br>TTG TTC TAT ACA ACC GTA CGC TGC AGG TCG AC             | C-terminal fusion of <i>SUN4</i><br>with HA              |
| SUN4-HA-rev                | GAA TGG GGT AAT AAT ACA ATC AAC TTA CTC AAC TGT<br>TGA TGC GCC TAA GTA TCG ATG AAT TCG AGC TCG            | C-terminal fusion of <i>SUN4</i><br>with HA              |
| SIM1-HA-fw                 | GTG TAC CGT CTC TGT TAC TTC CGG TAA AGC TCA TTT<br>CGT CTT ATA CAA TCG TAC GCT GCA GGT CGA C              | C-terminal fusion of <i>SIM1</i><br>with HA              |
| SIM1-HA-rev                | GAT GTG TTC GAA AAA AGA AAA AAA AAA GGA AAA GTA<br>GTA GTC ACG TAG CAT CGA TGA ATT CGA GCT CG             | C-terminal fusion of <i>SIM1</i><br>with HA              |
| p <sub>TEF</sub> -UTH1-fw  | CCT TCC TTT AAA CAA AAA TTT ACC CTC CCT TAA TTT<br>TTC AAG AAA TTC CAG TAT GCG TAC GCT GCA GGT CGA<br>C   | Insertion of p <sub>TEF</sub> in front of<br><i>UTH1</i> |
| p <sub>TEF</sub> -UTH1-rev | CTG GAG CGG CCA AGA CGG CGG TGG AGG CTG ATA<br>AAG CTA ATA GAG CGG ATA ATT TCA TCG ATG AAT TCT<br>CTG TCG | Insertion of p <sub>TEF</sub> in front of<br><i>UTH1</i> |
